# Supplementary material for: NFAP2, a novel cysteine-rich anti-yeast protein from Neosartorya fischeri NRRL 181: isolation and characterization
Source: PubMed Central journal article supplement (PMC5025423; doi:10.1186/s13568-016-0250-8), 2016-09-15
Supplement: 13568_2016_250_MOESM1_ESM.pdf [file 13568_2016_250_MOESM1_ESM.pdf]

## Supplementary materials

### AMB Express

NFAP2, a novel cysteine-rich anti-yeast protein from *Neosartorya fischeri* NRRL 181:  
Isolation and characterization

Liliána Tóth<sup>1</sup>, Zoltán Kele<sup>2</sup>, Attila Borics<sup>3</sup>, László G. Nagy<sup>3</sup>, Györgyi Váradi<sup>2</sup>, Máté Virágh<sup>1</sup>,  
Miklós Takó<sup>1</sup>, Csaba Vágvolgyi<sup>1</sup>, László Galgóczy<sup>1,4\*</sup>

<sup>1</sup>Department of Microbiology, Faculty of Science and Informatics, University of Szeged,  
Közép fasor 52, Szeged H-6726, Hungary

<sup>2</sup>Department of Medical Chemistry, Faculty of Medicine, University of Szeged, Dóm tér 8,  
Szeged H-6720, Hungary

<sup>3</sup>Institute of Biochemistry, Biological Research Centre, Hungarian Academy of Sciences,  
Temesvári krt 62, Szeged H-6726, Hungary

<sup>4</sup>Division of Molecular Biology, Biocenter, Innsbruck Medical University, Innrain 80-82,  
Innsbruck A-6020, Austria

\*Correspondence: galgoczi@gmail.com

<sup>1</sup>Department of Microbiology, Faculty of Science and Informatics, University of Szeged,  
Közép fasor 52, Szeged H-6726, Hungary

<sup>4</sup>Division of Molecular Biology, Biocenter, Innsbruck Medical University, Innrain 80-82,  
Innsbruck A-6020, Austria

**Table S1 Putative NFAP2 homologs from annotated filamentous *Ascomycota* genomes**

| Fungus                                       | Name of the protein                      | Acc. number or protein ID* | Sequence                                                   | Additional information                                                                                                                               | Database |
|----------------------------------------------|------------------------------------------|----------------------------|------------------------------------------------------------|------------------------------------------------------------------------------------------------------------------------------------------------------|----------|
| <i>Acremonium chrysogenum</i><br>ATCC 11550  | hypothetical protein ACRE_009950         | KFH48093.1                 | IATDAYYACNCPNNCGHKEGSSCKFYSGPSDNGIISGHCHYPNGNPMGAKECVP     | n.d.                                                                                                                                                 | NCBI     |
| <i>Acremonium strictum</i><br>DS1bioAY4a     | gm1.11729_g                              | 1373459                    | IATDAYYACNCPNNCGHSEGSCKYYGGPSDTHDIIISGTCNYPNGNRFASIECVA    | n.d.                                                                                                                                                 | JGI      |
|                                              | gm1.6463_g                               | 1368193                    | IATDPFFACQCPNNCDHSSGSSCKFYGGPSDSSNVVDGHCTDTADGLKCI         |                                                                                                                                                      |          |
| <i>Alternaria brassicicola</i>               | AB02612.1                                | 2612                       | IAPDAINACNCPNNCQHKLGDSCKFYKEGYVVT AICRATDDDDVLECR          | n.d.                                                                                                                                                 | JGI      |
| <i>Aspergillus fumigatus</i><br>var. RP-2014 | hypothetical protein BA78_8705           | KEY83917.1                 | IATSPYYACNCPNNCKHKKGSSCKYHSGPSDKSKVISGKCEWQGGQLNCIAT       | Origin: Brazil.<br>Isolation source: tropical forest floor.<br>Collection date: 2007.                                                                | NCBI     |
| <i>Aspergillus fumigatus</i> Z5              | hypothetical protein Y699_05481          | KMK56566.1                 | IATSPYYACNCPNNCKHKKGSSCKYHSGPSDKSKVISGKCEWQGGQLNCIAT       | Origin: China, Nanjing.<br>Isolation source: compost heaps.<br>Collection date: Mar 2010.                                                            | NCBI     |
| <i>Byssothecium circinans</i><br>CBS 675.92  | fgenes1_kg.8_#_209_#_Locus10000v1rpk3.04 | 489823                     | IAPDPIAACNCPNNCRHKNKGSSCKFYDNGNTISGECQIEGDHLKCA            | Origin: USA, South Dakota.<br>Isolation source: rotten crown.<br>Substrate (including host): <i>Medicago sativa</i> .                                | JGI      |
| <i>Claviceps purpurea</i> strain 20.1        | uncharacterized protein CPUR_03466       | CCE29619.1                 | IATDPFFACNCPNNCKHNEGTSRYYSNYSDSGPVSRGKCGWKNQLYCYA          | n.d.                                                                                                                                                 | NCBI     |
|                                              | uncharacterized protein CPUR_03467       | CCE29620.1                 | IATDAYHACNCPNNCGHKSMTGCRFFAGPSSNSNVLTKCESVGGYLSIAGPAQ      |                                                                                                                                                      |          |
|                                              | uncharacterized protein CPUR_03481       | CCE29634.1                 | IATDAYHACNCPNNCSYRSGSSCRFRGGPSGNAPVLKGCCEFVGGYLSIAQ        |                                                                                                                                                      |          |
|                                              | uncharacterized protein CPUR_03482       | CCE29635.1                 | IATDPYFACNCPNNCSHKEGSSCRYYKNFSDSGPVAKGKCGWQNGHLNCA         |                                                                                                                                                      |          |
| <i>Coniochaeta ligniaria</i><br>NRRL 30616   | fgenes1_kg.1_#_380_#_Locus11190v1rpk0.72 | 626667                     | IATDPVSACNCPNNCSHKSAGSSCKYYSGPSDSSPIDSGKCAWRGSLICVV        | n.d.                                                                                                                                                 | JGI      |
| <i>Coniochaeta</i> sp. PMI_546               | gm1.7183_g                               | 970051                     | IATDPVSACNCPNNCSHKKGSSCRYYSGPSDSSPVDSGHCEWRGSLICIV         | Isolation source: <i>Populus deltoides</i> .                                                                                                         | JGI      |
| <i>Daldinia eschscholzii</i> EC12            | gm1.7079_g                               | 24471                      | IATNSVAACNCPNNCSHKENSSCKFYSGPSDTSKVVVSGRCHSQNGVLTICIP      | n.d.                                                                                                                                                 | JGI      |
| <i>Eutypa lata</i> UCR-EL1                   | hypothetical protein UCREL1_925          | EMR72015.1                 | IATDPGYACTCPNNCDHHAGSSCKYYSGPSDNSPIIEGTCVDRNGLTCVA         | n.d.                                                                                                                                                 | NCBI     |
| <i>Hypoxylon</i> sp. CI-4A                   | gm1.10063_g                              | 16636                      | IATDAFSACNCPNNCDHSAGSSCKYHAGPSDSSKTVSGKCNKPNPNPYASLECIVTS  | n.d.                                                                                                                                                 | JGI      |
| <i>Hypoxylon</i> sp. CO27-5                  | gm1.426_g                                | 26620                      | IAVDVAACNCPNNCSHNGSSCKYLAGPSTSSVISGKCTPEADGTLICIPK         | n.d.                                                                                                                                                 | JGI      |
|                                              | gm1.7264_g                               | 33458                      | IATTAFAACNCPNNCDHKAAGSDCKYYSGPSSKSDVLKGCACAKPNPNPYASIECIPN |                                                                                                                                                      |          |
| <i>Hypoxylon</i> sp. EC38                    | gm1.528_g                                | 528                        | IAVDVAACNCPNNCSHNGSSCKYLAGPSTSSVISGKCTPEADGTLICIPK         | n.d.                                                                                                                                                 | JGI      |
|                                              | gm1.11636_g                              | 11636                      | IATTAFAACNCPNNCEHKAAGSDCKFYSGPSSKSDVLKGCACAKPNPNPYASIECIPN |                                                                                                                                                      |          |
| <i>Karstenula rhodostoma</i><br>CBS 690.94   | gm1.14118_g                              | 492330                     | IAPDPDAACNCPNNCQHSNGESCSFYRDGNHLDGICQHTGEGGRLLCVA          | Origin: Sweden, Uppland, Dalby Parish,<br>NW of farm Viggeby.<br>Substrate (including host): <i>Frangula alnus</i> .<br>Collection date: 25/02/1986. | JGI      |

|                                                |                                            |                |                                                             |                                                                                                                      |      |
|------------------------------------------------|--------------------------------------------|----------------|-------------------------------------------------------------|----------------------------------------------------------------------------------------------------------------------|------|
| <i>Massarina eburnea</i> CBS 473.64            | gm1.2277_g                                 | 514471         | IAADPVAACNCPGNCKHKNGDSCFKFYENGNTLSGQCVDGDHLKCV A            | Country: Switzerland, Zürich, Talstrasse, Rehalp Forest.<br>Substrate (including host): <i>Fagus sylvatica</i> .     | JGI  |
| <i>Melanomma pulvis-pyrius</i>                 | fgenesh1_kg.370_#_2_#_Locus74v1rpkml368.98 | 327945         | IAPDPISACNCPNNCQHKVGSCKFYSGQNTLSGECQLNGNAGNLICIA            | n.d.                                                                                                                 | JGI  |
| <i>Myriangium duriae</i> CBS 260.36            | gm1.4858_g                                 | 293795         | IAPDPTSACNCPKNCSHHAGSSCKFYRNGNVITGVCNDVGGHLICQD             | Origin: Argentina, Delta del Paraná.<br>Substrate (including host): <i>Chrysomphalus aonidium</i> .                  | JGI  |
| <i>Niesslia exilis</i> CBS 358.70              | estExt_Genemark1.C_1_t10048                | 854608         | IATNPFYACNCPNNCDHGPDSCKYYDGPSTSPVVDGTCQSSGSATGWNCVPN        | Origi: Netherlands, Noord Brabant, Kampina Heide.<br>Substrate (including host): <i>Pteridium aquilinum</i> petiole. | JGI  |
|                                                | estExt_Genemark1.C_190067                  | 864148         | IATTSY AACNCPNNCSY TQGSSCKYFAGPSD TDTIISGTCQYPNGNQAAEITCIA  |                                                                                                                      |      |
|                                                | gm1.8228_g                                 | 828052         | IATDAYSACNCPNNCSYSGQTGCRYYSTPSNSGPV ASGTCDY PGGNHNSGLTCIPSS |                                                                                                                      |      |
| <i>Paraconiothyrium sporulosum</i> AP3s5-JAC2a | estExt_Genemark1.C_5_t20273                | 1259469        | IAANPDAACNCPNNCQHNNGDSCSFYRDGNQLNGICQHTGEGGRLLCNA           | n.d.                                                                                                                 | JGI  |
| <i>Pseudogymnoascus pannorum</i> VKM F-3808    | hypothetical protein O988_03546            | KFY00055.1     | IATDPYYACNCPNNCSYKPGTGCRFYSGPSDNSKVLK GK CQNKNGLTCIPT       | Origin: Russia, Tverskaya oblast.<br>Isolation source: hair.                                                         | NCBI |
| <i>Pseudogymnoascus pannorum</i> VKM F-4513    | hypothetical protein V494_01379            | KFY44674.1     | VATDPYYACNCPNNCSYKEGSGCRFYSGPSDNSRILK GK CHR KD GKLTCVP     | Origin: Russia, Kolyma Lowland.<br>Isolation source: permafrost soil.                                                | NCBI |
| <i>Pseudogymnoascus pannorum</i> VKM F-4514    | hypothetical protein V495_02588            | KFY46251.1     | IATDPYYACNCPNNCSYKPGTGCRFYSGPSDNSKVLK GK CQNKNGLTCIPT       |                                                                                                                      |      |
| <i>Pseudogymnoascus pannorum</i> VKM F-4516    | hypothetical protein V497_02880            | KFY61541.1     | IATDPYYACNCPNNCSYKPGTGCRFYSGPSDNSKVLK GK CQNKNGLTCIPT       |                                                                                                                      |      |
| <i>Pyrenophora tritici-repentis</i>            | PTRT_08027                                 | 153706         | IAPDATNACNCPNNCRHRVGDSCFKFYQQGYVVTATCQQGGANGALICK           | n.d.                                                                                                                 | JGI  |
| <i>Sordaria macrospora</i> K-hell              | hypothetical protein SMAC_09189            | XP_003344816.1 | IATDPFYACNCPNNCSHRAGSGCKYHSGPSDKSSVVKGKCVVRGGGLTCVSG        | Tissue type: mycelium.                                                                                               | NCBI |
| <i>Thozetella</i> sp. PMI_491                  | gm1.14407_g                                | 828875         | IAPDPVAACNCPNNCKHHLGSSCKFYSGNVLSGVCQHDGSGLKCAV              | Origin: Australia.<br>Isolation source: bark.                                                                        | JGI  |

Abbreviation of databases: NCBI, National Center for Biotechnology Information; Bethesda, MD, USA; JGI, Joint Genome Institute; Walnut Creek, CA, USA. \*: In the cases of NCBI and JGI database the accession number and the protein ID is given, respectively

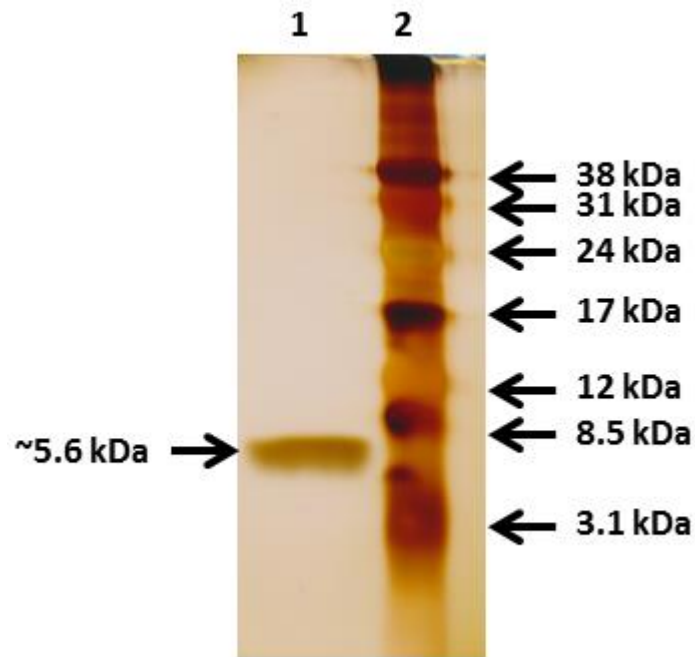

**Fig. S1** Purity of the NFAP2 after the ion-exchange chromatography, checked with 18% (w/v) tris-glycine sodium dodecyl sulfate-polyacrylamide gel (Novex™ 18% Tris-Glycine Mini Protein Gels, 1.0 mm, 10-well; Thermo Fisher Scientific, Waltham, MA, USA) electrophoresis. Protein bands were detected with silver staining. Lane 1: purified NFAP2 (1.5  $\mu$ g), lane 2: Low-range Amersham Rainbow Marker (GE Healthcare Life Sciences, Little Chalfont, UK)

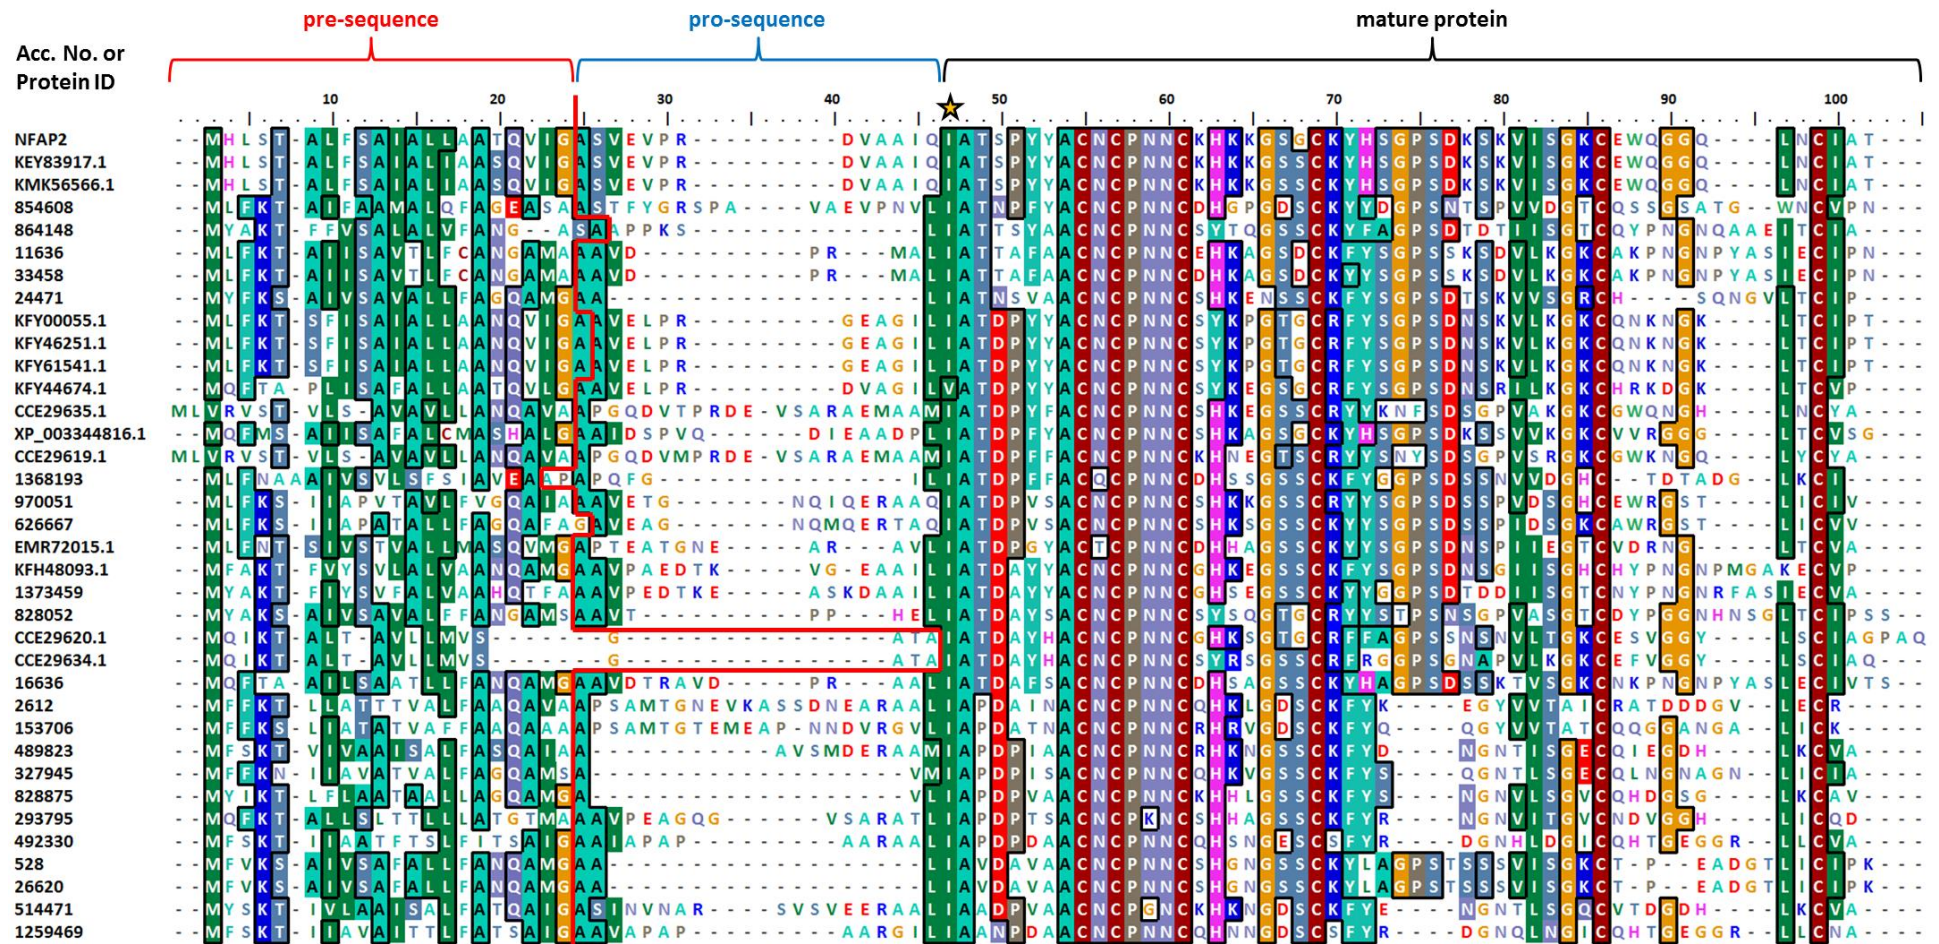

**Fig. S2** Alignment of the putative NFAP2 homolog proteins from filamentous ascomycetes. Red line indicates the cleavage site of the predicted signal sequence (SignalP1 4.1 server; Petersen et al. 2011). First amino acid of the mature protein is marked by an asterisk. Accession number or the protein ID is indicated in the figure

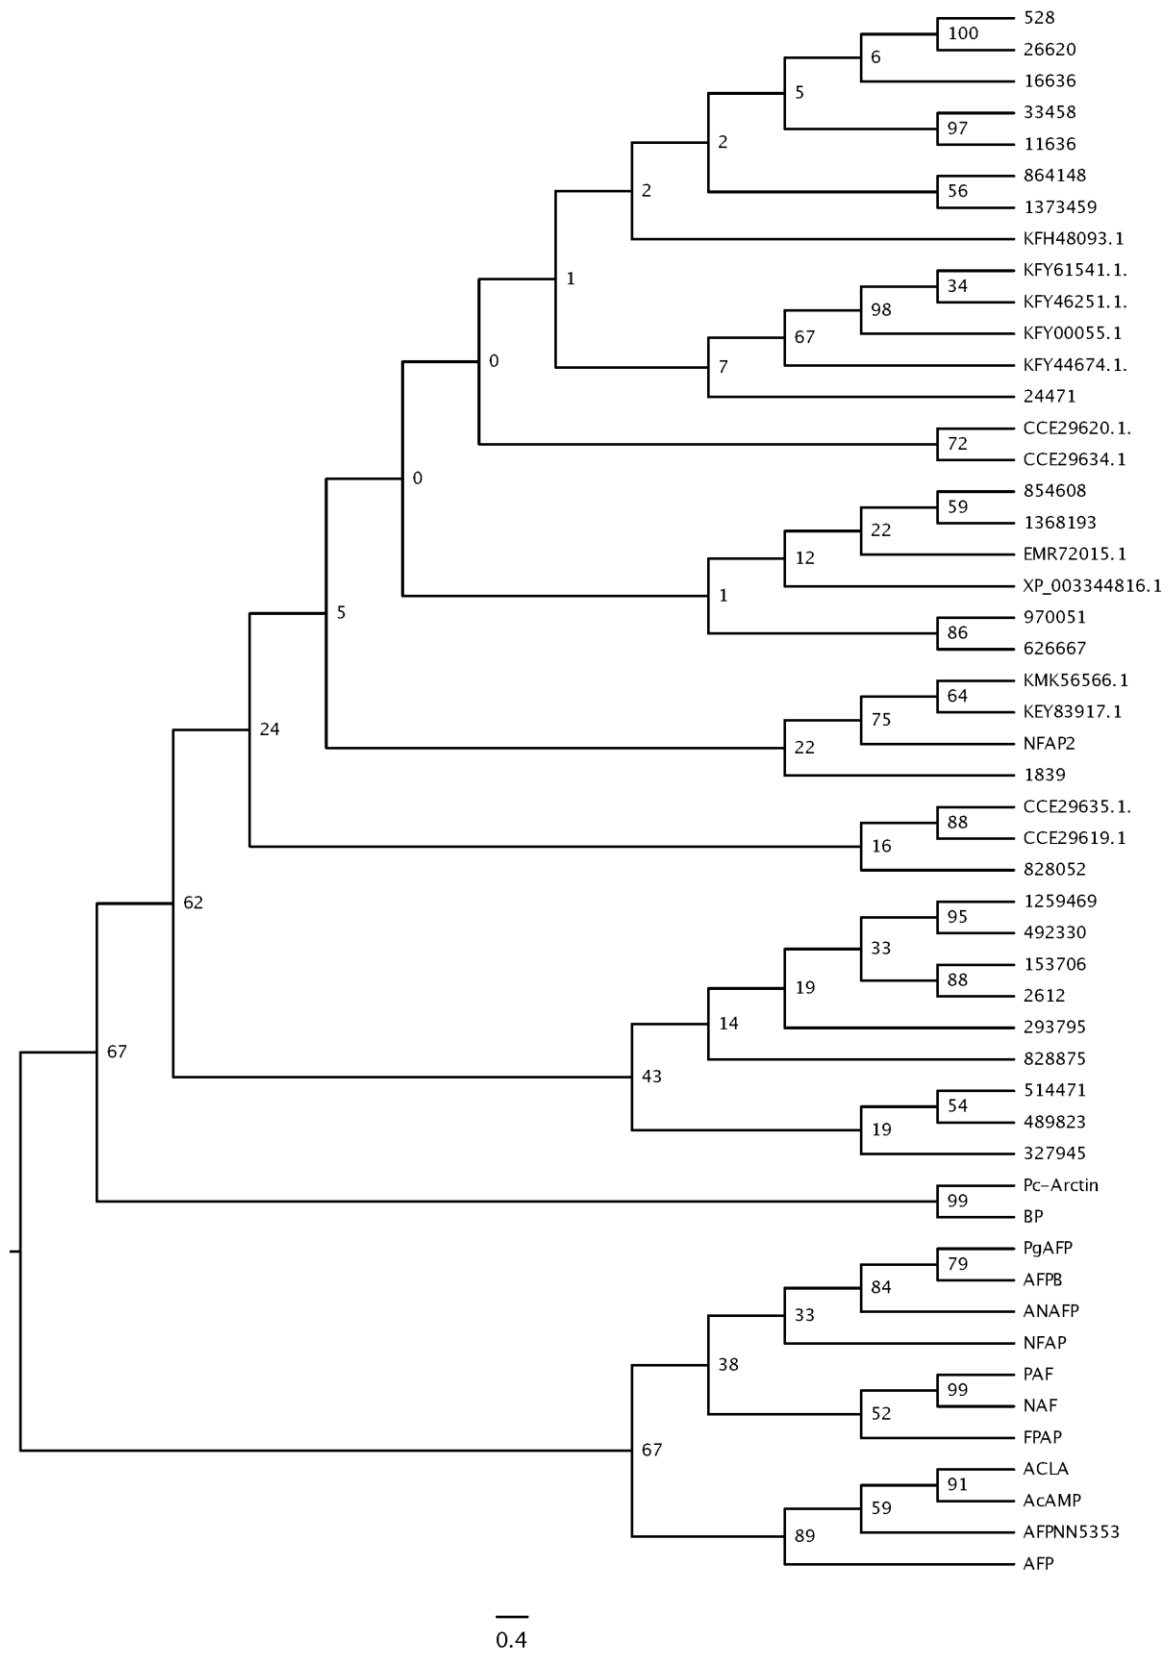

**Fig. S3** Bootstrap values of the maximum likelihood tree presented in Fig. 3b

AcAFP, *Aspergillus clavatus* VR1 antifungal protein (Acc. No.: A1CSS4); AcAMP, *Aspergillus clavatus* ES1 antimicrobial peptide (Acc. No.: D3Y2M3); AFP, *Aspergillus giganteus* MDH 18894 antifungal protein (Acc. No.: P17737); AFP<sub>NN5353</sub>, *Aspergillus giganteus* A3274 antifungal protein (Acc. No.: -); AFPB, *Penicillium digitatum* CECT 20796 antifungal protein (Acc. No.: K9FGI7); ANAFP, *Aspergillus niger* KCTC 2025 antifungal protein (Acc. No.: A2QM98); BP, *Penicillium brevicompactum* Dierckx ‘bubble protein’ (Acc. No.: G5DC88); FPAP, *Fusarium polyphialidicum* SZMC 11042 antifungal protein (Acc. No.: E1UGX4); NAF, *Penicillium nalgiovense* BFE 66, 67, 474 antifungal protein (Acc. No.: -); NFAP, *Neosartorya fischeri* NRRL 181 antifungal protein (Acc. No.: D4YWE1); NFAP2, *Neosartorya fischeri* NRRL 181 antifungal protein 2 (Acc. No.: A1DBL3); PAF, *Penicillium chrysogenum* Q176 antifungal protein (Acc. No.: B6HWK0); Pc-Arctin, *Penicillium chrysogenum* A096 ‘bubble protein’ (Acc. No.: CAP96194); PgAFP, *Penicillium chrysogenum* RP42C antifungal protein (Acc. No.: D0EXD3). The Acc. No. or Protein ID of the putative NFAP2 homolog proteins is indicated. For further information (species name, sequence, etc.) see Table S1
